1  
2  
3  
4  
5  
6  
7  
8  
9  
10  
11  
12  
13  
14  
15  
16  
17  
18  
19  
20  
21

Properties of multi-vesicular release from rod photoreceptors support transmission of single photon responses

Hays, CL<sup>1,3</sup>, Sladek, AL<sup>2</sup> Field GD<sup>4</sup>, Thoreson WB<sup>2,3</sup>

<sup>1</sup>Cellular and Integrative Physiology, <sup>2</sup>Pharmacology and Experimental Neuroscience, <sup>3</sup>Truhlsen Eye Institute and Department of Ophthalmology and Visual Sciences, College of Medicine, University of Nebraska Medical Center, Omaha, NE 68106, USA, <sup>4</sup>Department of Neurobiology, Duke University School of Medicine, Durham, NC, USA

**Corresponding author:** Wallace B. Thoreson, PhD.  
Truhlsen Eye Institute and Department of Ophthalmology and Visual Sciences  
University of Nebraska Medical Center  
4050 Durham Research Center  
Omaha, NE 68198-5840

Email: [wbthores@unmc.edu](mailto:wbthores@unmc.edu)

Phone: 402-559-2019

**Keywords:** rods; exocytosis; mouse; glutamate transporter anion current; retina; ribbon synapse; vision

22 **Abstract**

23 Vision under starlight requires rod photoreceptors to transduce and transmit single photon  
24 responses to the visual system. This remarkable sensitivity depends on a small voltage change reliably  
25 reducing glutamate release such that post-synaptic rod bipolar cells can robustly detect the signal. To  
26 transmit this small signal, we have found that rod vesicle release deviates strongly from a Poisson process  
27 under conditions that mimic darkness. Specifically, at their resting membrane potential in darkness, rods  
28 exhibit coordinated and regularly timed multivesicular release events. Each release event consisted of ~17  
29 vesicles and occurred 2-3 times more regularly than expected from a Poisson process. Hyperpolarizing rods  
30 to mimic the voltage change produced by a single photon response abruptly reduced the probability of  
31 multivesicular release nearly to zero with a rebound increase in release probability at stimulus offset.  
32 Simulations of these release dynamics indicate that this regularly timed, multivesicular release promotes  
33 transmission of single photon responses to post-synaptic neurons. Furthermore, the mechanism is efficient,  
34 requiring fewer vesicles to be released per second than unquantal release governed by Poisson statistics.

35

## 36 **Introduction**

37           One of the most impressive features of the visual system is the ability to detect single photons.  
38 Pioneering psychophysical studies showed that humans can detect flashes consisting of a few photons  
39 hitting the retina, indicating that individual rods can respond to the absorption of single photons and then  
40 reliably signal these events to postsynaptic neurons (Barlow, 1956; Hecht et al., 1942; Sakitt, 1972; Tinsley  
41 et al., 2016). The ability of rods to respond to single photons was subsequently confirmed by  
42 electrophysiological recordings (Baylor et al., 1984; Gross et al., 2015; Reingruber et al., 2015; Rieke and  
43 Baylor, 1998). In darkness, rods maintain a relatively depolarized membrane potential of around -40 mV,  
44 and the absorption of a photon produces a small hyperpolarization, between 1 and 3.5 mV (Cangiano et al.,  
45 2012; Hornstein et al., 2005; Schneeweis and Schnapf, 1995). Rods signal the absorption of a photon to  
46 post-synaptic rod-bipolar cells by decreasing the rate of glutamate release. However, synaptic vesicle  
47 release is an intrinsically noisy process that is typically described by Poisson statistics (Malagon et al.,  
48 2016; Miki, 2019; Zhang and Peskin, 2015), posing a problem for postsynaptic bipolar cells to distinguish  
49 a genuine decrease in vesicle release caused by the absorption of a photon from a stochastic pause in vesicle  
50 release. How does the rod transform a small voltage change into a sufficiently large and reliable change in  
51 vesicle release?

52           One proposed solution is for a rod to maintain a high basal rate of vesicle release. Under the  
53 assumption of Poisson release, a rod would need to maintain a basal release rate of ~100 vesicles/s to  
54 generate a sufficiently reliable signal to distinguish single photon responses from stochastic variability in  
55 vesicle release (Rao-Mirotnik et al., 1998; Rao et al., 1994; Schein and Ahmad, 2005; van Rossum and  
56 Smith, 1998). This solution requires an extremely high turnover of vesicles that is energetically and  
57 physically demanding. Furthermore, measurements from salamander, gecko and mouse rods show basal  
58 release rates of only 10-20 vesicles/s (Hays et al., 2020b; Sheng et al., 2007) .

59           A second proposed solution is to make release more regular than a Poisson process. For example,  
60 implementing an Erlang process that releases vesicles at regular intervals would reduce the likelihood of

61 mistaking a stochastic decrease in vesicle release for the absorption of a photon (Schein and Ahmad, 2005).  
62 While Poisson statistics accurately describe vesicle release at many central synapses, this may not  
63 necessarily be true at the ribbon-style synapses in rods. Ribbons are plate-like, presynaptic structures that  
64 tether multiple vesicles along the surface and it has been suggested that delivery of vesicles down a ribbon  
65 may help to make release more regular (Schein and Ahmad, 2005).

66 To identify how single photon responses can be signaled by changes in vesicle release from rods,  
67 we recorded presynaptic anion currents associated with glutamate transporter activity in mouse rod  
68 terminals (Hays et al., 2020b). The glutamate transporters in rods (largely EAAT5) are linked to an  
69 uncoupled anion conductance so that an anion channel opens as glutamate is retrieved (Arriza et al., 1997;  
70 Schneider et al., 2014). Glutamate anion currents ( $I_{A(\text{glu})}$ ) vary linearly with glutamate levels in the synaptic  
71 cleft and thus provide a presynaptic measure of glutamate release (Hasegawa et al., 2006; Otis and Jahr,  
72 1998). Using these techniques, we observed stochastic release of individual vesicles that obeyed Poisson  
73 statistics when rods were voltage-clamped at  $-70$  mV. However, at the typical resting membrane potential  
74 in darkness of  $-40$  mV, release transitioned to regularly spaced multivesicular release events of  $\sim 17$  vesicles  
75 apiece (Hays et al., 2020b). We found that the probability of initiating multivesicular release events was  
76 nearly abolished by a small membrane hyperpolarization similar to single photon responses. A model of  
77 the empirically determined, voltage-dependent vesicle release dynamics combined with an ideal observer  
78 analysis reproduced the flash sensitivity of mouse rod-bipolar cells (Field and Rieke, 2002a). These results  
79 show that regularly timed multivesicular release events in rods can enhance post-synaptic detection of small  
80 voltage changes evoked by the absorption of individual photons. Furthermore, this strategy is efficient,  
81 achieving greater sensitivity than Poisson release while requiring fewer vesicles per second.

82

83 **Methods**

84 *Animals*

85 Control C57/B16 mice were kept on 12-hour dark-light cycles and animal handling protocols were  
86 approved by the University of Nebraska Medical Center Institutional Animal Care and Use Committee.  
87 Mice of both sexes aged 4-12 weeks were euthanized in accordance with AVMA Guidelines for the  
88 Euthanasia of Animals by CO<sub>2</sub> asphyxiation followed by cervical dislocation.

89

90 *Electrophysiology*

91 Recordings from rods were performed using a flatmount preparation of isolated retina.  
92 Immediately after euthanizing the mouse, it was enucleated and eyes were placed in Ames' medium (US  
93 Biological) bubbled with 95% O<sub>2</sub>/5% CO<sub>2</sub>. The cornea of an eye was punctured with a scalpel and the  
94 anterior segment removed. The retina was isolated by cutting optic nerve attachments. After making four  
95 fine cuts at opposite poles of the retina, it was flattened photoreceptors face up onto a glass slide in the  
96 perfusion chamber. The retina was anchored in place using a brain slice harp (Warner Instruments, cat. no.  
97 64-0250). The perfusion chamber was placed on an upright fixed-stage microscope (Nikon E600FN) with  
98 a 60x water-immersion, long-working distance objective (1.0 NA). Unless otherwise noted, the retina was  
99 superfused with room temperature Ames' solution bubbled with 95% O<sub>2</sub> /5%CO<sub>2</sub> at ~1 mL /min. Prior to  
100 recording, outer segments from a region of the retina were removed by gentle suction applied through a  
101 broken patch pipette. Rod cell bodies were identified morphologically and targeted with positive pressure  
102 using recording electrodes mounted on Huxley-Wall micromanipulators (Sutter Instruments).

103 Rod recordings were performed in whole-cell voltage clamp using a Multiclamp 700A amplifier  
104 (Axon Instruments/Molecular Devices) and signals digitized with a DigiData 1550 (Axon  
105 Instruments/Molecular Devices). Data acquisition and analysis was performed using pClamp 10 Software  
106 (Molecular Devices). Voltages were not corrected for liquid junction potential (KSCN pipette solution:  
107 3.9 mV). Most experiments were performed in room light but in some experiments, retinas were prepared  
108 and electrodes positioned in darkness under infrared illumination using Gen III night vision goggles.

109 Intracellular pipette solutions for  $I_{A(\text{glu})}$  measurements contained (in mM): 120 KSCN, 10 TEA-Cl,  
110 10 HEPES, 1 CaCl<sub>2</sub>, 1 MgCl<sub>2</sub>, 0.5 Na-GTP, 5 Mg-ATP, 5 EGTA, 5 phosphocreatine, pH 7.3. Rods were  
111 distinguished from cones by their smaller membrane capacitance. Passive membrane properties of rods  
112 averaged  $C_m = 3.2 \pm 0.2$  pF;  $R_m = 2.3 \pm 0.04$  G $\Omega$  (mean  $\pm$  SD, n = 20).

113  $I_{A(\text{glu})}$  event frequency, kinetics, and charge transfer were measured from events identified with the  
114 event finder function in pClamp directed by a template that included a sampling of ~10 manually curated  
115 events. Statistical analysis was performed on GraphPad Prism versions 7 and 8 and all data are represented  
116 as mean  $\pm$  SD unless otherwise noted.

117

### 118 *Rod Vesicular Release and Photocurrent Models*

119 *Erlang release model (model 1)*: Multivesicular release from the rod terminal was modeled as an  
120 Erlang process (Fig. 7). To generate stochastic Erlang events with a spontaneous event rate of  $R_s$  and a  
121 coefficient of variation  $1/\sqrt{E_f}$ , a Poisson process was first generated with an event rate of  $R_s * E_f$ . For  
122 every  $E_f$  Poisson events that were generated, an Erlang event was generated producing stochastic events  
123 that were  $\sqrt{E_f}$  more regularly spaced in time than a Poisson process (see Fig. 7B-D & 7F-H). These discrete  
124 events were modeled as delta-functions and then convolved with an alpha waveform:

$$125 \quad M(t) = a * \frac{t}{\tau_r} * e^{-\frac{t}{\tau_r}} \quad (1)$$

126 Finally, independent Gaussian noise was added (Fig. 7E & I). To model the release dynamics following a  
127 single photon response, the Poisson process was made time-dependent (Fig. 7B), such that following the  
128 absorption of a simulated photon, the Poisson rate was set to zero for a  $T$  seconds, then set to  $A$  and  
129 exponentially relaxed back to the baseline rate with a time constant of  $\tau$ . In these simulations, time was  
130 sampled at 0.1 ms to ensure the probability that the Poisson process generated a value other than 0 or 1 was  
131 miniscule ( $< 0.0001$ ). In the unlikely event that a value  $> 1$  was sampled, the value was set to 1.

132 *Poisson release model (model 2)*: To compare the flash detection performance of multivesicular  
133 release governed by an Erlang process to that of asynchronous Poisson release (Fig. 8), a similar procedure  
134 was followed as that described in the preceding paragraph. However, Poisson events were not accumulated  
135 to generate an Erlang event and the suppression of the vesicular release following a simulated single photon  
136 response was set to 25% of the spontaneous release rate to match previous estimates given the membrane  
137 potential of rods and given the voltage-dependence of calcium channel activation (Schein and Ahmad,  
138 2005, 2006).

139 *Rod photocurrent model (model 3)*: To model the rod photocurrent and the detection sensitivity  
140 limits set by photocurrent noise sources (Fig. 8), we used a generative model of the rod response (Field et  
141 al., 2019). A rod response,  $r(t)$ , was generated from the following equation:

$$142 \quad r(t) = \sum_{n=1}^N \left( r_{\mu}(t) + \sum_i w_i c_i(t) \right) + \sum_{d=1}^{N_d} \left( r_{\mu}(t - t_d) + \sum_j w_j c_j(t - t_d) \right) + \eta(t) \quad (2)$$

143 Continuous dark noise,  $\eta(t)$ , was generated by sampling from a Gaussian distribution and filtered in time  
144 to match the power spectrum of measured continuous noise (Field et al., 2019).  $N$  photon responses in an  
145 individual rod were generated by the first term in Eq. 2 by sampling from a Poisson distribution with a  
146 mean given by the flash strength on a given trial. The mean single photon response is given by  $r_{\mu}(t)$ , and  
147 the covariance of the single photon response is captured by summing over a weighted set,  $w_i$ , of  
148 eigenvectors,  $c_i(t)$ , derived from the covariance matrix of the single photon response (Field et al., 2019).

149 Finally, discrete noise events caused by the thermal activation of rhodopsin were captured by the second  
150 term of Eq. 2:  $N_d$  thermal isomerizations were generated using the same formulation as for the single  
151 photon response, but  $N_d$  was determined by sampling from a Poisson distribution with a mean given by the  
152 thermal isomerization rate and each isomerization event occurred at random and independent times given  
153 by  $t_d$ .

154 In the original formulation of this model (Field et al., 2019), the noise parameters were derived  
155 from measurements of the photocurrent from primate rods. We adjusted these parameters to account for the  
156 greater amounts of continuous noise and variability in the single-photon response present in mouse rods  
157 (both relative to the amplitude of the mean single-photon response). Specifically, the continuous noise was  
158 increased by 22% and single-photon response variability was increased by 37.5% (Field and Rieke, 2002a,  
159 b). The kinetics of the single photon response and the shape of the power spectrum of the continuous noise  
160 are both similar between mouse and primate rods, so no adjustments were made to these quantities. The  
161 thermal rate in mammalian and mouse rods is somewhat uncertain, with the literature allowing for a wide  
162 range of values between 0.001 and 0.015 Rh\*/rod/s, so we chose an intermediate value of 0.005 Rh\*/rod/s  
163 (Burns et al., 2002; Field et al., 2019; Fu et al., 2008; Yue et al., 2017). Importantly, this model for  
164 simulating rod responses reproduces rod detection and temporal sensitivities in a two-alternative forced-  
165 choice (2AFC) task (Field et al., 2019), supporting the application of this model for analyzing task  
166 performance of pools of rods.

167

### 168 *Two-Alternative Forced Choice Task and Ideal Observer Analysis.*

169 Using each the three models described in the previous section, detection threshold was determined  
170 using a two-alternative forced-choice (2AFC) task and an ideal observer analysis. The task was to determine  
171 for a pair of trials, which trial contained the ‘flash’, and which was the ‘no-flash’ trial. The ideal observer  
172 was constructed from a training set of simulated flash and no-flash (null) responses (1,000 of each). Note,



173 in the training phase, the simulated flash responses consisted only of single photon responses without  
174 Poisson fluctuations in the number of photons absorbed. From these simulated responses, a difference-of-  
175 means linear discriminant was constructed (Duda et al., 2001):

$$176 \quad D = \mu_{flash} - \mu_{null} \quad (3)$$

177 where  $D$  is the linear discriminant,  $\mu_{flash}$  and  $\mu_{null}$  are the mean of the flash and no-flash responses,  
178 respectively. Then the dot-products of the flash and no-flash responses with the discriminant were  
179 calculated; each set of projections yielded an approximately Gaussian distribution associated with the flash  
180 and no-flash trials. Thus, their means and standard deviation were used to summarize the distributions:  $\mu_A$ ,  
181  $\mu_B$ ,  $\sigma_A$ , and  $\sigma_B$ , where  $A$  and  $B$  denote the distributions of flash and no flash responses, respectively, after  
182 computing their dot products with the discriminant. Then a new ‘test’ set of flash and no-flash responses  
183 were simulated and discriminated by the ideal observer using a Bayes-optimal nonlinear weighting.

$$184 \quad R = \sum_i^P w_i(r_i(t) \cdot D) \quad (4)$$

185 where,  $P$  is the number of rods in the pool,  $r(t)$  is a given response (flash or no flash),  $D$  is the discriminant  
186 from Equation (3), and  $w_i$  is the nonlinear weight given by:

$$187 \quad w_i = \frac{G(r_i(t) \cdot D | \mu_A, \sigma_A) \times P(1|f)}{G(r_i(t) \cdot D | \mu_B, \sigma_B) \times P(0|f)} \quad (5)$$

188  $G(X|\mu, \sigma)$  is the probability of sampling  $X$  from a Gaussian distribution with mean,  $\mu$ , and standard deviation  
189  $\sigma$ ,  $P(Y|\lambda)$  is the probability of sampling  $Y$  from a Poisson distribution with mean  $\lambda$ ; and  $f$  in Eq. 5 is the  
190 flash strength used to generate the ‘flash’ responses, which acts like a prior in the Bayesian sense. Note, in  
191 the ‘test’ set, the simulated flash responses included Poisson fluctuations in the number of photons absorbed  
192 from trial-to-trial.

193 Responses were simulated for flash strength  $f$  and compared to responses of flash strength 0. When  
194 if  $R_f$  (flash response)  $> R_0$  (no flash response), the trial was scored as correct, if  $R_f < R_0$ , the trial was scored

195 as incorrect and if  $R_f = R_o$ , the trial was randomly scored as correct with 50% probability.

196

### 197 *Statistical Analysis*

198 To test whether release rates reflected a Poisson process, interevent interval histograms were fit with a  
199 one-phase exponential decay. In a second approach, the number of release events was tallied over a long  
200 period (30 s) to calculate the average number of release events per second ( $\lambda$ ). A fractional frequency  
201 distribution of events was then made using 1-second bins and fit with a Poisson model:

202 Equation 6: 
$$P(x) = \frac{\lambda^x e^{-\lambda}}{x!}$$

203 where  $P$  is the probability of observing  $x$  number of events and  $e$  is Euler's constant. We calculated the  
204 best-fit  $\lambda$  value (mean events in an interval) in that cell using GraphPad Prism 7.

205

## 206 **Results**

207 To study voltage-dependent vesicular glutamate release from rods, we recorded  $I_{A(\text{glu})}$  from rods using  
208 flatmount mouse retina preparations (Fig. 1). When rods were held for many seconds at -60 or -70 mV,  
209 similar to the membrane potential achieved in bright light, we observed occasional inward currents arising  
210 from activation of glutamate transporters on the rod terminal (Fig. 1) (Grassmeyer et al., 2019). As  
211 described earlier (Hays et al., 2020b), these inward currents had waveforms typical of quantal post-synaptic  
212 currents but with a slow time course (10-90% rise time of 9-10 ms with decay time constants of ~40 ms).  
213 Spontaneous inward currents in rods voltage-clamped at -70 mV showed a unimodal amplitude distribution  
214 suggesting they consisted entirely of unquantal events (Fig. 1C). The overall rate of release increased at  
215 depolarized membrane potentials but achieved a rate at room temperature of only 4-5 vesicles/s at -40 mV,  
216 similar to the membrane potential in darkness. As shown previously, release rates and  $I_{Ca}$  were doubled by  
217 increasing the bath temperature to 35 °C, attaining an average rate of ~11 v/s/ribbon at -40 mV (Hays et

218 al., 2020b). Accompanying this increased rate of vesicle release was a switch to more coordinated forms  
219 of release with semi-regular multivesicular release events dominating release in rods held at  $-40$  mV (Fig.  
220 1A-B). Occasional unitary events were interspersed among these multivesicular events and so the overall  
221 distribution of event amplitudes measured at  $-40$  mV was bimodal (Fig. 1C). As described previously (Hays  
222 et al., 2020b), multivesicular release events involved the rapid sequential release of 10-20 vesicles triggered  
223 by  $\text{Ca}^{2+}$  influx and derived from a pool of ribbon-associated vesicles shared with evoked release.

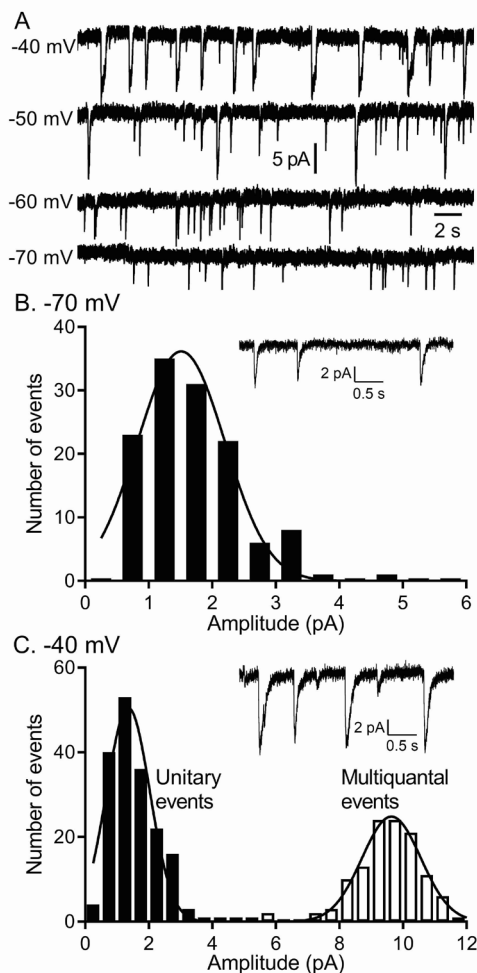

224  
225 **Figure 1** The quantity of glutamate released measured by  $I_{A(\text{glu})}$  increased with depolarization  
226 but near  $-40$  mV, release shifted from single vesicle fusion events to multivesicular release events  
227 consisting of 10-20 vesicles apiece. **A.** Representative traces from a single rod clamped at various  
228 voltages. **B.** Example recording and amplitude histogram of unitary  $I_{A(\text{glu})}$  events from a rod voltage-  
229 clamped at  $-70$  mV. Amplitude histogram was fit with a Gaussian function (mean  $\pm$  SD =  $1.51 \pm$   
230  $0.688$  pA;  $n = 127$  events). **C.** Example recording and amplitude histogram from the same rod held  
231 at  $-40$  mV. Amplitude histograms for unitary (black bars) and multivesicular (open bars) events

232 were each fit with Gaussian functions (mean unitary event amplitude =  $1.35 \pm 0.685$  pA; n = 178  
233 events; multiquantal event amplitude =  $9.64 \pm 0.924$  pA, n=118 events).

234

235 *Multivesicular Release was not modeled by Poisson Statistics*

236 It is generally accepted that under conditions of low release probability (e.g., when a neuron is  
237 hyperpolarized), vesicle exocytosis occurs stochastically, obeying Poisson statistics (Malagon et al., 2016;  
238 Miki, 2019; Zhang and Peskin, 2015). Spontaneous release can be  $\text{Ca}^{2+}$ -independent or due to chance  
239 openings of voltage-gated  $\text{Ca}^{2+}$  channels (Cork et al., 2016; Kavalali, 2015, 2019). The persistence of  
240 spontaneous events in rods held at  $-70$  mV, even after blocking  $\text{Ca}^{2+}$  channels with extracellular  $\text{Cd}^{2+}$  or  
241 strongly buffering intracellular  $\text{Ca}^{2+}$  with 10 mM BAPTA, showed evidence for  $\text{Ca}^{2+}$ -independent release  
242 (Hays et al., 2020b). To analyze frequency distributions, only rods in which we observed  $>50$  events were  
243 included in the data set. The frequency distributions of interevent intervals for release events detected in  
244 rods voltage-clamped at  $-70$  mV (e.g., Fig. 2A) consistently exhibited a single exponential decay as  
245 predicted for a Poisson release process ( $R^2 = 0.97 \pm 0.04$ , mean  $\pm$  SD, n = 9 rods; Fig. 2B). The probability  
246 of the number of release events that occur in a 1 s interval was also well fit using a Poisson probability  
247 distribution (Equation 6; Fig. 2C). The Poisson fit for spontaneous events was robust ( $R^2 = 0.94 \pm 0.07$ , n =  
248 9 rods) and the mean number of events per second predicted from the Poisson fit,  $\lambda = 1.06 \pm 0.55$  (n=9),  
249 was very close to the actual mean number of events observed in the same sample ( $\lambda = 1.0 \pm 0.6$ , p = 0.83,  
250 n = 9).

251 These results indicate that the rate of  $\text{Ca}^{2+}$ -independent spontaneous release from rods at hyperpolarized  
252 membrane potentials is a Poisson process. Does Poisson release persist when  $\text{Ca}^{2+}$ -dependent release is  
253 engaged at more depolarized potentials? At the typical resting potential in darkness ( $-40$  mV), we observed  
254 periodic multivesicular events along with occasional unitary events (Fig. 2A). Like those observed at  $-70$   
255 mV, the intervals between unitary events at  $-40$  mV were well described by a single exponential (Fig. 2D,  
256 filled squares,  $R^2 = 0.90 \pm 0.07$ , n = 9 rods), consistent with an underlying Poisson release process.  
257 However, if we treated each multivesicular event as an individual release event, histograms of interevent

258 intervals could not be fit by single exponentials suggesting that multivesicular events are not released by a  
259 Poisson process (Fig. 2D, bars).

260 We estimated the number of vesicles released in each event by dividing the total charge transfer during  
261 each multivesicular event by the average charge transfer for unitary events measured at the same potential  
262 in the same cell. Glutamate transporter currents continue to increase even after saturation of post-synaptic  
263 mGluR6 receptors indicating that transporters are not normally saturated during release from rods  
264 (Hasegawa et al., 2006). This implies that the charge transfer for each  $I_{A(\text{glu})}$  vesicle release event should  
265 sum linearly. A Poisson distribution could not describe the frequency distribution of individual vesicle  
266 release events counted in this way. During each 1-second interval, there was either a multivesicular release  
267 event or no release event and so interevent intervals were distributed bimodally (Fig. 2E). The frequency  
268 distribution could not be fit with a Poisson model (equation 6), yielding negative  $R^2$  values ( $-0.7 \pm 0.6$ ,  $n =$   
269  $9$ ) both when  $\lambda$  was unconstrained ( $\lambda = 2.5$  in Fig. 2F) and when  $\lambda$  was constrained to the actual mean  
270 number of events/s ( $\lambda = 11$  in Fig. 2F). Thus, unlike unitary event statistics, the statistics of multivesicular  
271 release were not well described by a Poisson distribution.

272 Fitting the interevent intervals for multivesicular events with a Gaussian function yielded better fits  
273 (mean  $R^2 = 0.84 \pm 0.12$ ) than fitting with an exponential function. Interevent intervals averaged  $2.4 \pm 0.57$   
274 s ( $N = 14$ ) with a coefficient of variation (CV) of  $0.44 \pm 0.08$ . For a Poisson distribution where variance =  
275 mean, the mean interval between multivesicular events predicts a CV of 0.64. Narrowing the interval  
276 distribution is a characteristic of an Erlang distribution that waits a certain number of Poisson intervals  
277 before each Erlang event. The number of Poisson intervals,  $k$ , that occur before each Erlang event is related  
278 to the CV by the formula:

$$279 \quad \text{CV} = 1/(k)^{1/2}$$

280 The intervals between multivesicular events were consistent with Erlang factors ranging from 3-12 and  
281 averaged  $k = 5.79 \pm 2.68$  ( $n=14$ ).

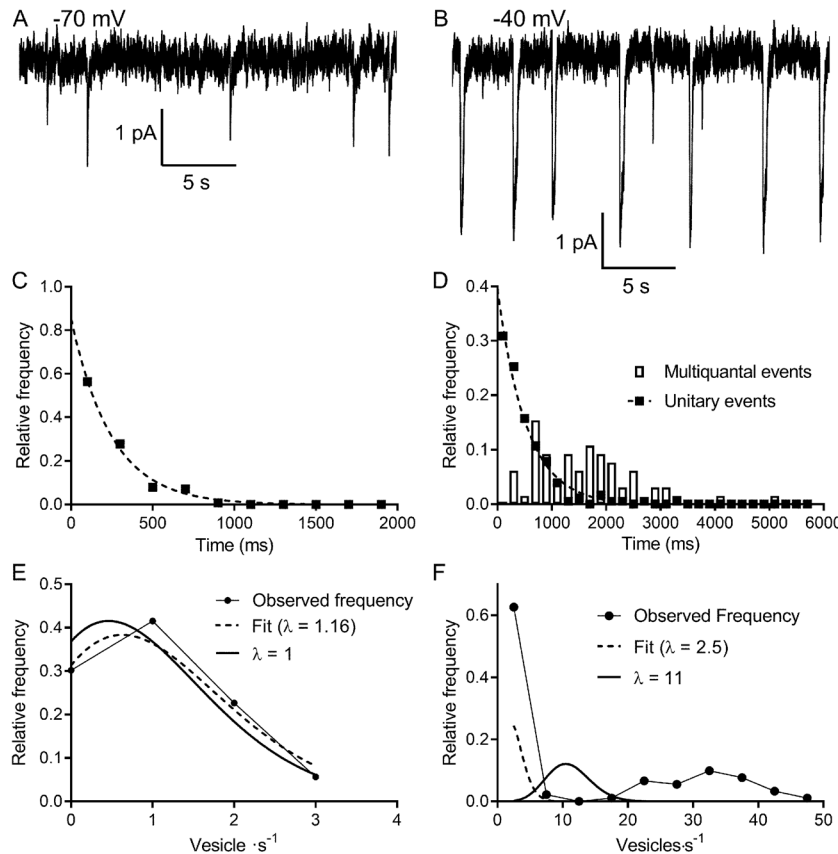

282  
 283 **Figure 2** Multivesicular release events are not Poisson distributed in time. **A & B.**  
 284 Lengthy recording segments illustrating the stochastic release of individual vesicles at  $-70$   
 285 mV (A) with more regular multivesicular release events at  $-40$  mV (B). **C.** Plot of the  
 286 interevent interval frequency distribution for unitary events measured at  $-70$  mV. Consistent  
 287 with a Poisson distribution, these data were well fit with a one-phase exponential decay ( $\tau =$   
 288 248 ms;  $R^2 = 0.993$ ). **D.** Frequency histogram of intervals between both unitary (filled  
 289 squares) and multivesicular (open bars) events. The distribution of intervals between unitary  
 290 events was well described by a single exponential function ( $\tau = 532$  ms;  $R^2 = 0.985$ ) whereas  
 291 the intervals between multivesicular events were poorly fit with a single exponential. **E.**  
 292 Graph of the relative frequency of individual vesicle release events measured at  $-70$  mV  
 293 occurring in 1 s bins measured over 90 – 180 s. Data were fit with the Poisson equation  
 294 (equation 6) constrained to the observed mean of  $\lambda = 1$  event per s (dashed line, calculated,  
 295  $R^2 = 0.88$ ). We obtained an even better fit but with a similar value for  $\lambda$  when it was  
 296 unconstrained (dashed line, fit  $\lambda = 1.16$ ,  $R^2 = 0.95$ ). Data from the same cell shown in C and  
 297 D. **F.** Graph of the relative frequency of quanta released in each 1 s bin. If we consider each  
 298 of the quanta released in a multivesicular event as separate release events, then there were  
 299 either 0 or  $\sim 35$  quanta released per s. This distribution was not well described by Poisson  
 300 statistics, whether  $\lambda$  was constrained to match the actual mean quantal rate of 10.98 (solid  
 301 line,  $R^2 = -0.39$ ) or when  $\lambda$  was unconstrained (dashed line, best fit  $\lambda = 2.5$ ,  $R^2 = 0.46$ ).

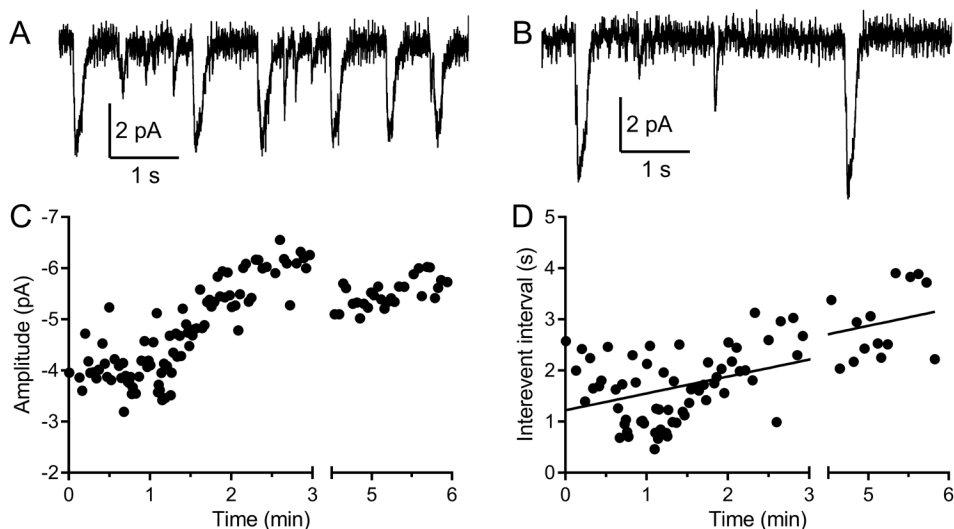

302

303 **Figure 3.** Multivesicular events increased in amplitude and declined in frequency during recording. **A**  
304 & **B.** Example traces recorded from the same rod held at  $-40$  mV during the first minute (**A**) and after 5  
305 minutes (**B**). **C.** The amplitude of multivesicular events as a function of time during the recording. **D.** The  
306 intervals between multivesicular events as a function of time (room temperature). The plot of intervals (s)  
307 as a function of time after patch rupture (min) were fit with a linear regression (y-intercept = 1.22 s, slope  
308 = 0.33 s/min,  $R^2 = 0.42$ ,  $n=123$  intervals).

309

### 310 *Impact of experimental conditions on statistics of multivesicular release*

311 The conditions of our experiments differ from dark-adapted conditions *in vivo*. We therefore  
312 investigated how different aspects of these experiments might have impacted the observed release  
313 dynamics. We began by examining the impact of dark adaptation. During dark adaptation, ribbons can  
314 increase in length in mouse rods (Dembla et al., 2020) and bursts involve release from the pool of vesicles  
315 at the base of the ribbon (Hays et al., 2020b). Thus, dark adaptation might influence the statistics of vesicle  
316 release. However, when holding dark-adapted rods at  $-40$  mV, we found that the number of vesicles in each  
317 multivesicular release event ( $16.7 \pm 5.8$ ,  $n=7$ ) and the intervals between multivesicular event start times  
318 ( $2.0 \pm 0.54$  s,  $n=6$ , room temperature) did not differ significantly from those measured in light-adapted  
319 retinas ( $17 \pm 7$  v/burst,  $n=22$ ,  $p=0.74$ , unpaired t-test;  $2.4 \pm 0.62$  s intervals,  $n=14$ ,  $p=0.18$ , unpaired t-test)  
320 (Hays et al., 2020b). Thus, recording from rods in light-adapted versus dark-adapted states did not strongly  
321 alter release statistics. One caveat is that in both light- and dark-adapted retinas, we mechanically removed  
322 outer segments to expose the inner segments and cell bodies prior to recording.

323 Next, we examined the potential impact of physiological rundown following membrane rupture by the  
324 patch pipette for voltage clamping the rods. As illustrated in Fig. 3, multivesicular events increased in  
325 amplitude during the first few minutes of recording as  $\text{SCN}^-$  diffused into the rod from the patch pipette.  
326 There was also a decrease in multivesicular event frequency after patch rupture, presumably due to rundown  
327 of the release mechanism. When the intervals between multivesicular events were plotted against time after  
328 patch rupture, the slopes of the linear regressions were all significantly non-zero ( $n=5$  rods, room  
329 temperature). The y-intercept values averaged  $1.23 \pm 0.45$  s whereas the overall mean interval between  
330 multivesicular events in this sample averaged  $2.26 \pm 0.60$  s ( $n=5$ , room temperature). This suggests that  
331 the interevent intervals present at patch rupture were roughly half the overall average interval between  
332 multivesicular release events yielding approximately twice the release rate.

333 Finally, we examine the impact of temperature. Due to more rapid rundown at higher temperatures,  
334 most of our recordings were performed at room temperature ( $\sim 22$  deg C). Elevating the bath temperature  
335 also shortened release intervals, from  $2.4 \pm 0.57$  s ( $N = 14$ ) at room temperature to  $1.13 \pm 0.67$  s ( $n=5$ ) at  
336 35 deg C. While rundown was more rapid at 35 deg C, if we simply assume a similar amount of rundown  
337 as seen at room temperature, this suggests interevent intervals at 35 deg C as short as 615 ms (i.e., a  
338 frequency of 1.6 Hz). Alternatively, if we assume that the most rapid rates measured at 35 deg C come  
339 from the healthiest cells and are thus more representative of genuine rates *in vivo*, then interevent  
340 intervals one standard deviation below the mean of  $\sim 465$  ms suggest a rate of 2.2 Hz. These various lines  
341 of reasoning converge on a spontaneous rate of multivesicular release events in darkness at physiological  
342 temperatures from intact mouse rods of  $\sim 2$  Hz.

343

#### 344 *Multivesicular Release is Sensitive to Small Voltage Changes*

345 We examined the impact of small voltage changes on the probability of multivesicular release events  
346 from rods. We hypothesized that multivesicular release may play a role in transmitting single photon  
347 responses from rods because multivesicular release occurred most prominently in rods near the typical  
348 membrane potential in darkness and was not observed in cones. In mouse rods, the voltage changes



349 evoked by single photon absorption average  $\sim 3.5$  mV (Cangiano et al., 2012). To test the sensitivity of  
350 multivesicular release to small voltage changes, we voltage clamped the rod at  $-40$  mV for 30 s and then  
351 applied a hyperpolarizing step to  $-43.5$  mV. This small hyperpolarization consistently produced an  
352 appreciable pause in release (Fig. 4A). The average interevent intervals measured over a 30 s period at  
353  $-43.5$  mV ( $3819 \pm 2346$ , 104 intervals) were significantly longer than those measured during the prior 30  
354 s period at  $-40$  mV ( $2385 \pm 1396$  ms, 193 intervals,  $p < 0.0001$ , t-test,  $n = 7$  rods). In addition, the  
355 interval to the first multivesicular event observed after the step (red triangles in Fig. 4B show  
356 measurements from individual trials) was consistently delayed by more than one standard deviation above  
357 the mean interevent intervals measured at  $-40$  mV. Single photon responses of primate rods appear to be  
358 smaller than those of mouse rods and average only  $\sim 1$  mV (Schneeweis and Schnapf, 1995). We found  
359 that steps of  $-1$  ( $n = 5$ ; filled circles in Fig. 4B) and  $-2$  mV ( $n = 5$ ; stars in Fig. 4B) also produced  
360 appreciable pauses in multivesicular events immediately after the step. This lengthening of release  
361 intervals could potentially improve the signaling of single photon responses to post-synaptic bipolar cells,  
362 allowing genuine reductions in release caused by a photon to be distinguished from a stochastic  
363 fluctuation in release.

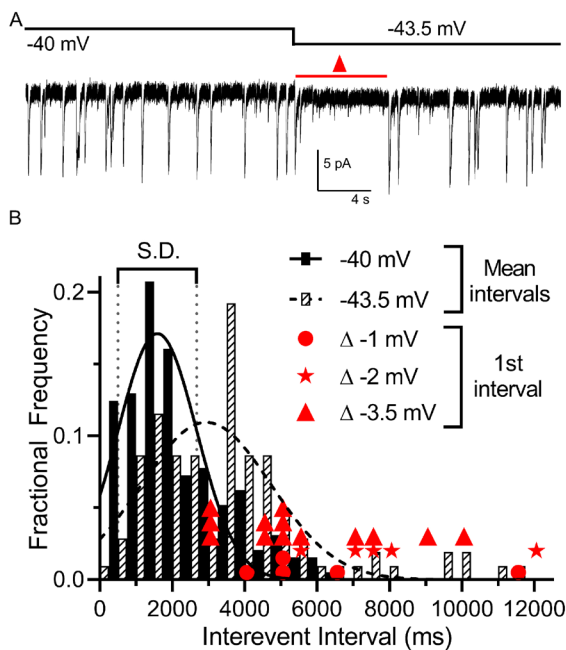

365 **Figure 4** Multivesicular release was sensitive to small hyperpolarizing steps. **A.**  
366 Example trace showing that multivesicular  $I_{A(\text{glu})}$  release events paused for several seconds  
367 immediately after hyperpolarizing the rod from  $-40$  to  $-43.5$  mV and the overall rate of these  
368 events remained slower for the remainder of the step. Red triangle denotes the time interval  
369 measured and plotted as red triangles in panel B. **B.** Frequency distribution of intervals  
370 between multivesicular events measured at  $-40$  and  $-43.5$  mV ( $n = 7$  rods), each fit with a  
371 single Gaussian. Hyperpolarization extended the mean interval between multivesicular  
372 events from  $1846 \pm 1055$  ms at  $-40$  mV to  $3106 \pm 1808$  ms at  $-43.5$  mV ( $p < 0.0001$ , paired  
373 t-test). Filled circles, stars and triangles show the intervals measured in individual trials  
374 immediately after hyperpolarizing steps of 1, 2, or 3.5 mV, respectively. All of these intervals  
375 were  $>1$  standard deviation (vertical dotted lines) above the mean interval between  
376 multivesicular events measured at  $-40$  mV.

377

378 To further investigate the capability of a single photon absorption event to reduce multivesicular  
379 release, we clamped rods at  $-40$  mV and applied a voltage waveform that mimicked the amplitude and  
380 kinetics of a single-photon voltage response in a mouse rod (Fig. 5). This voltage waveform was  
381 constructed from a two exponential function that attained a peak amplitude of 3.4 mV after 245 ms and  
382 then declined with a time constant of 2.5 s (Fig. 5A) (Cangiano et al., 2012). In rods voltage-clamped at  
383  $-40$  mV, we repeated this single photon voltage stimulus for 20-60 trials (Fig 5A). Binning the  
384 multivesicular release events in time revealed that release probability declined almost to zero at the peak  
385 of the simulated light response, falling in parallel with membrane hyperpolarization (Fig 5B;  $n = 1778$   
386 events from 26 rods). Multivesicular release then rebounded with an overshoot as the membrane potential  
387 recovered, showing  $\sim 50\%$  more events initiated during the first few hundred milliseconds after  
388 termination of the simulated light response (between 3000-4000 ms, Fig 5B). The voltage stimulus did  
389 not truncate multivesicular events that had started prior to the stimulus; events that continued during the  
390 stimulus had the same number of quanta, measured by charge transfer, as prior events ( $p = 0.53$ , t-test,  $n =$   
391 5 rods, not shown).

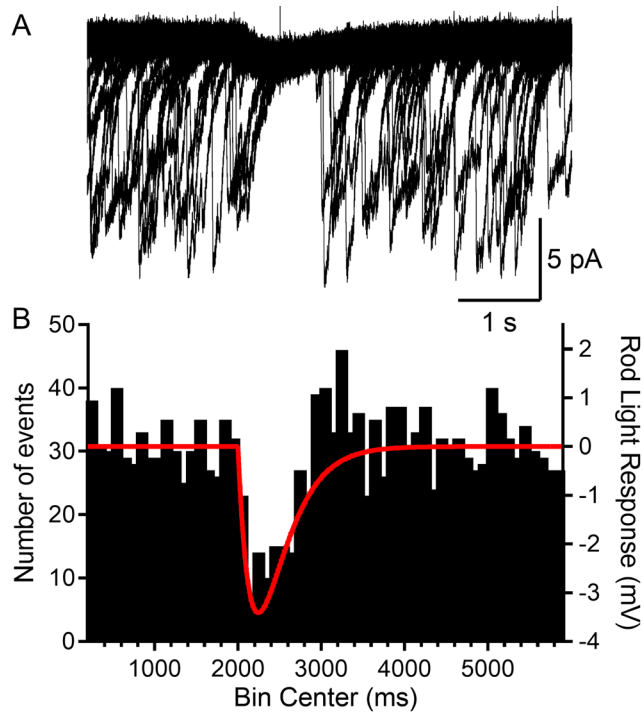

392

393 **Figure 5.** Rods voltage clamped at  $-40$  were presented a voltage stimulus that mimicked the  
394 single photon response of mouse rods. **A.** Example of a rod presented with the voltage stimulus 30  
395 consecutive times, showing an appreciable pause in release during the single photon voltage  
396 waveform. **B.** Summary data showing the number of multivesicular events (1778 events, 26 rods)  
397 initiated before, during and after the voltage stimulus (red trace). Multivesicular release events were  
398 almost never initiated during the single photon waveform.

399 *White Noise Analysis*

400 To identify voltage changes that preferentially evoke multivesicular release in rods, we held rods  
401 at  $-40$  mV and applied a white noise voltage stimulus with a standard deviation of 3.5 mV and high  
402 frequency cutoff of 5 Hz, consistent with the rod power spectrum (Chichilnisky and Rieke, 2005). The  
403 average stimulus waveform that preceded each multivesicular event, i.e., the event triggered average (ETA)  
404 waveform, consisted of a small hyperpolarizing excursion followed by a larger depolarizing excursion with  
405 a time course roughly similar to termination of a single photon response ( $n = 4$  rods; Fig. 6A). Using a white  
406 noise voltage stimulus with a smaller standard deviation (0.8 mV), the ETA showed a waveform with a  
407 similar shape and time course (Fig. 6B). When we tested a similarly small stimulus but with 20 Hz cutoff,  
408 the ETA appeared as noise (Fig. 6C), suggesting the rod terminal preferentially responds to slow voltage  
409 changes with frequency response characteristics of rods in light and dark, filtering out higher frequency

410 membrane voltage noise. These data reinforce the idea that transmitter release from rods is very sensitive  
411 to small, slow voltage changes similar to those experienced during a single photon response, consistent with  
412 a role of these multivesicular events in transmitting small light responses at the rod ribbon synapse.

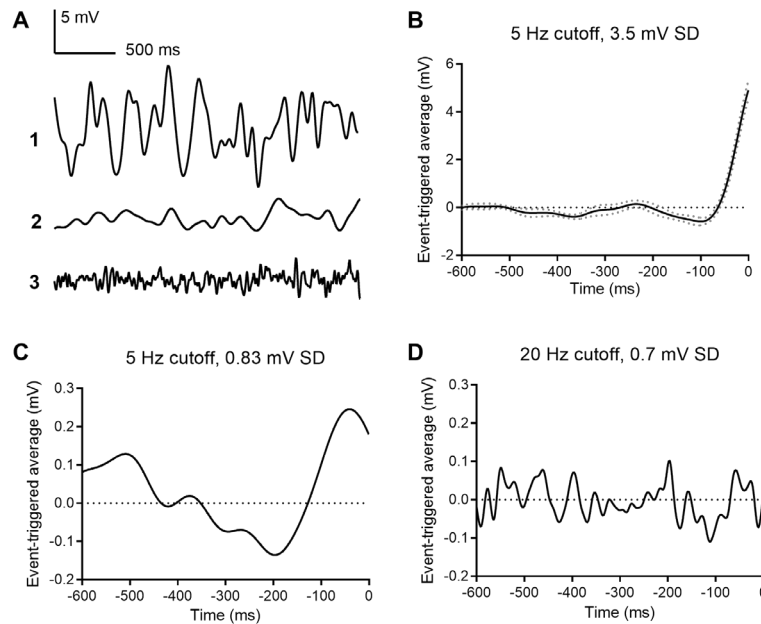

413

414 **Figure 6.** Event triggered averages (ETAs) compiled from responses to white noise voltage  
415 stimuli. **A.** 2.5 s segments of white noise voltage stimulus with 5 Hz cut-off and 3.5 mV SD. **B.**  
416 ETA evoked by the same white noise stimulus. **C.** ETA evoked by a smaller stimulus with 5 Hz  
417 cutoff but only 0.8 mV SD. **D.** ETA evoked by a white noise stimulus with 20 Hz cut-off and 0.7  
418 mV SD.

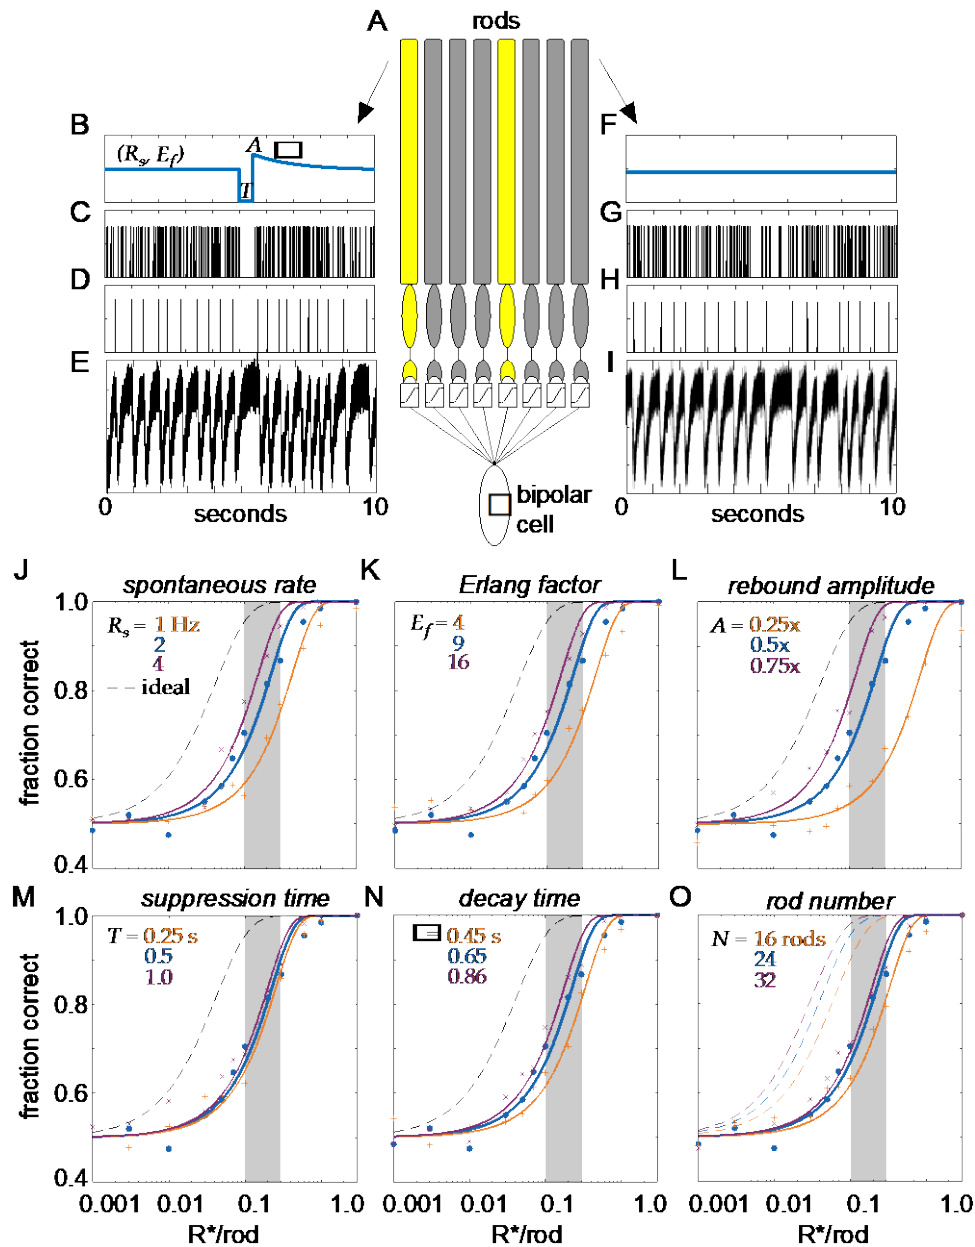

419

**Figure 7:** Model of clockwork multi-vesicular release can account for the detection threshold of rod bipolar cells. **A.** Schematic of a pool of simulated rod photoreceptors providing input to a simulated rod bipolar cell. Yellow rods indicate cells absorbing a photon, gray rods indicate cells generating only noise. **B.** Temporal dynamics of transmitter release illustrating the key parameters of the Erlang release model (see text for details). A flash is delivered 5 s into the trial. **C.** Poisson counts underlying the Erlang process. **D.** Accumulation of 9 Poisson events in **C** triggers an Erlang event. **E.** Erlang events in **D** convolved with function mimicking multi-vesicular release (Eq. 1), with additive Gaussian noise. **F-I.** Same as **B-E**, but for a rod that does not absorb a photon. **J-O,** Fraction correct in two-alternative forced-choice detection task as a function of flash strength. Points show output of model, curves show cumulative Gaussian fits. Blue shows performance of model for parameters estimated from data. Orange and purple show performance for lower and higher model parameters, respectively, for spontaneous release rate (**O**), Erlang factor (**R**), rebound amplitude (**L**), suppression time (**M**), decay time (**N**), and rod number in pool (**O**).

420 *Simulation of vesicle release dynamics indicates efficient transmission of the single photon response.*

421         The previous experiments suggest the multivesicular release dynamics observed in rods held at -  
422 40 mV could be used for transmitting single photon responses to rod bipolar cells. We examined the  
423 consequences of these release statistics on transmitting single photon responses by generating a model of  
424 rod release dynamics matched to those we measured, and by utilizing an ideal observer analysis to  
425 examine the resulting signal fidelity (Chichilnisky and Rieke, 2005; Field et al., 2019; Smith and Dhingra,  
426 2009).

427         Multivesicular release was modeled as a time-dependent Erlang process across a population of  
428 simulated rods forming the receptive field of a rod-bipolar cell (Fig. 7A; Erlang release model, see  
429 Methods). In darkness, the release probability was constant in time (Fig. 7F); the absorption of a photon  
430 caused a suppression of release lasting  $T$  seconds (Fig. 7B). Note, this will generate the same integrated  
431 change in release probability as exponential decay with a time constant of  $T$ . Following suppression,  
432 release probability rebounded to an amplitude of  $A$  above baseline and then decayed exponentially back  
433 to baseline with a time constant  $\tau$  (Fig. 7B). To generate Erlang release statistics, we first sampled an  
434 inhomogeneous Poisson process (Fig. 7C). Poisson events were counted until reaching the Erlang factor,  
435  $E_f$ . When the counter reached  $E_f$ , this generated a release event (Fig. 7D) and the counter was reset. This  
436 yielded sub-Poisson variability with a coefficient of variation less than a Poisson process by  $1/\sqrt{E_f}$ .  
437 Release events were convolved with a template and independent Gaussian noise was added to  
438 approximate recorded rod release events (compare Fig. 7E with Fig. 2B).

439         The fidelity of rod output with these vesicle release dynamics was assayed using a two-alternative  
440 force-choice (2AFC) task and an ideal observer analysis (Chichilnisky and Rieke, 2005; Field et al., 2019;  
441 Smith and Dhingra, 2009). For the 2AFC task, one response was generated by simulating a flash of  
442 strength  $S$  delivered to a population of  $N$  rods. A second response was generated with no flash. The task  
443 of the ideal observer was to identify the response containing the flash. The ideal observer was constructed  
444 by calculating the optimal linear discriminant separating flash from no-flash trials in each individual rod.

445 The dot product between this template and each individual response was calculated and then weighted by  
446 the likelihood it was generated by the given flash strength (see Methods). This procedure instantiates an  
447 optimal linear filtering of the rod output followed by an optimal nonlinear weighting that approximates  
448 the nonlinear threshold performed at the rod-to-rod bipolar synapse (Field and Rieke, 2002b; Field et al.,  
449 2019). The fraction of trials in which the flash response was correctly identified was calculated over 400  
450 trials at each flash strength; flash strengths ranged from 0.001 to 1.0 photo-isomerizations ( $Rh^*$ ) per rod.

451 For a simulated population of 24 rods, the probability of detecting flashes varied smoothly with flash  
452 strength, reaching 75% correct in the 2AFC task between 0.1 and 0.2  $Rh^*/rod$  (Fig. 7J, blue curve). This  
453 performance fell short of an optimal photon detector that is limited only by Poisson variability in the  
454 number of photons absorbed from trial to trial (Fig. 7J, dashed curve) (Field et al.). However, flash  
455 detection performance compared well to previous measurements of rod bipolar cell sensitivity, which  
456 place their detection threshold (75% correct in the 2AFC task) between 0.1 and 0.3  $Rh^*/rod$  (Fig. 7J,  
457 vertical gray bar) (Field and Rieke, 2002b; Okawa et al., 2010). Thus, the performance of the simulated  
458 rod output with temporally regular multi-vesicular release falls within the range of flash sensitivities  
459 demanded by rod-bipolar cell measurements. This indicates that the observed rod vesicle release  
460 dynamics can account for rod bipolar cell flash sensitivity.

461 We next examined how this result depended on different choices of model parameters: while the  
462 chosen parameters were taken from our measurement of rod vesicle release (biased toward the earliest  
463 portion of the recordings and the highest temperatures), our recordings allow for a range of potential  
464 values under physiological conditions. We examined how detection performance depended on the multi-  
465 vesicular event rate ( $R_s$ ), the Erlang factor ( $E_f$ ), the rebound amplitude ( $A$ ), the suppression time ( $T$ ), the  
466 decay time ( $\tau$ ), and the number of rods in the pool ( $N$ ) (Figs. 7J-O). In general, the detection threshold  
467 was not strongly impacted over a reasonable range of these model parameters: the flash strength  
468 generating 75% correct performance was consistent with the detection threshold of rod-bipolar cells (Fig.  
469 7J-O, gray bars).

470 Two features of this multi-vesicular release model distinguish it from previous examinations of rod  
471 vesicle release. The first feature is multi-vesicular release. Each multi-vesicular event contains ~17  
472 vesicles. With a release rate of ~2 multi-vesicular events/s, this means the rod terminal will release ~34  
473 vesicles per second. Thus, we analyzed how performance of the multi-vesicular release model compared  
474 with asynchronous Poisson release of 34 vesicles per second (Fig. 8A; Poisson release model, see  
475 Methods). For comparison, we also included performance of an ideal detector and that predicted from the  
476 rod photocurrent (Fig. 8A; rod photocurrent model, see Methods). The temporally regular multi-vesicular  
477 release model exhibited higher sensitivity than asynchronous Poisson release, given a fixed vesicle budget  
478 of 34/s. Thus, the observed statistics of vesicle release from the rod terminal appear to be efficient relative  
479 to asynchronous release, given a fixed vesicle budget.

480 The second feature distinguishing this model is the temporal regularity of vesicle release. The idea of  
481 temporally regular release has been postulated previously (Schein and Ahmad, 2005), but not shown  
482 experimentally or considered in the context of multi-vesicular release. The temporal regularity of release  
483 is modeled here by the Erlang factor ( $E_r$ ), which reduces variability in the intervals between multi-  
484 vesicular events. Our data showed a reduction in interevent variability relative to a Poisson process,  
485 consistent with Erlang factors of 3-12 (average 5.8; see Fig. 2). Examining detection thresholds as a  
486 function of the Erlang factor revealed that over a range of multi-vesicular release rates, detection  
487 thresholds fell considerably as the Erlang factor increased to 4 and Erlang factors greater than 9 exhibited  
488 rapidly diminishing returns on detection thresholds (Fig. 8B). Thus, further increasing the regularity of  
489 interevent intervals (increasing the Erlang factor above 9) yields relatively small improvements to the  
490 fidelity of transmitting single photon responses to rod bipolar cells.

491



492

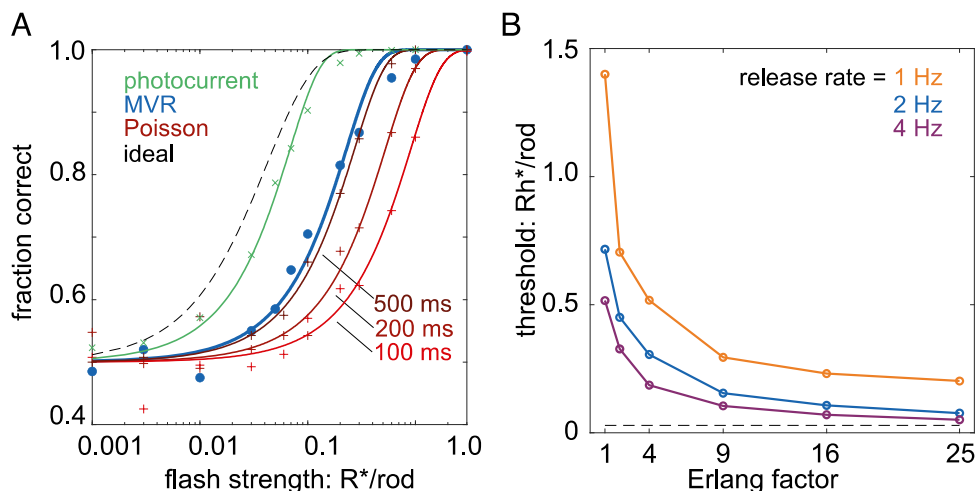

**Figure 8.** Temporally regular multivesicular release supports flash detection. **A.** Comparison of different models in 2AFC detection task. Black dashed curve is performance of an ideal photon detector. Green is performance predicted from rod photocurrents. Blue is performance of the multivesicular Erlang release model (Fig. 7). Red curves show performance of asynchronous Poisson release for three different release suppression durations (100, 200, and 500 ms). Points show simulation results, curves show cumulative Gaussian fits. **B.** Comparison of detection thresholds (75% correct performance) in the 2AFC task for different release rates and Erlang factors, using the multivesicular release model.

## 493 Discussion

494 To better understand how responses of rods to single photons can be transmitted reliably to downstream  
495 neurons, we examined the mechanisms by which ongoing release from rods can be regulated by small  
496 changes in membrane potential. Using  $I_{A(\text{glu})}$  as a presynaptic assay for release, we found that at a membrane  
497 potential similar to that in darkness, rods released glutamate-filled vesicles in coordinated multi-vesicular  
498 release events at rates that were not well modeled by Poisson statistics. Multi-vesicular events occurred at  
499 more regular intervals consistent with an Erlang distribution in which events occurred after waiting 3-12  
500 Poisson intervals. Multi-vesicular release events were also extremely sensitive to small voltage changes.  
501 Simulating the impact of these properties on release showed that they can improve the ability of rod bipolar  
502 cells to discriminate suppressed release caused by absorption of a single photon from stochastic pauses in  
503 release.

504 The ability of the vertebrate visual system to detect single photons arises from high photon capture  
505 rates combined with high gain in the phototransduction cascade of rods. Next, the relatively small changes

506 in membrane voltage produced by absorption of a single photon must produce an appreciable change in the  
507 rate of release at the rod synapse. At the synapse from rods to rod bipolar cell dendrites, there is a non-  
508 linear thresholding mechanism in which only responses that exceed a certain size are transmitted, removing  
509 baseline noise along with small responses that fall below that threshold (Berntson et al., 2004; Field and  
510 Rieke, 2002b; Sampath and Rieke, 2004). In mouse retina, where 20-35 rods converge onto each rod  
511 bipolar cell (Behrens et al., 2016; Calkins and Sterling, 1999; Rao-Mirotznik et al., 1998; Tsukamoto and  
512 Omi, 2013), comparisons between rods and rod bipolar cells showed thresholds that excluded 40-85% of  
513 the single photon events in rods (Berntson et al., 2004; Field and Rieke, 2002b; Schein and Ahmad, 2006).  
514 In rabbit retina, where 100 rods may converge onto each rod bipolar cell, as many as 90% of the single  
515 photon responses are removed by the thresholding mechanism (Trexler et al., 2011). Finally, as many as  
516 100,000 rods eventually converge onto a single ganglion cell, allowing the capture of scarce single photons  
517 to produce detectable changes in retinal output (Field et al., 2019; Goodchild et al., 1996; Okawa and  
518 Sampath, 2007; Takeshita et al., 2017; Taylor and Smith, 2004).

519 The non-linear thresholding mechanism used at rod bipolar synapses is thought to occur before  
520 summation of rod responses in the rod bipolar cell soma (Field and Rieke, 2002b; Sampath and Rieke,  
521 2004). A key requirement for this non-linear thresholding is that glutamate levels in the cleft must be  
522 maintained at levels high enough to keep the rod bipolar cell glutamate receptors saturated. By relieving  
523 saturation in the receptor signaling cascade, larger reductions in glutamate release have disproportionately  
524 larger effects (Sampath and Rieke, 2004). In addition to improving regularity, multivesicular release by  
525 rods may help ensure that glutamate levels remain high enough at individual synapses to maintain saturation  
526 in darkness.

527 Our previous recordings of release from a sample of mouse rods suggested an overall rate of release at  
528  $-40$  mV of  $\sim 11$  v/s at 35 deg C (Hays et al., 2020b). However, assessments of rundown in the present study  
529 suggest that the true rate *in vivo* prior to patch rupture may be twice this average rate. Earlier computer  
530 simulations suggested that, assuming a purely Poisson release process, post-synaptic detection by rod

531 bipolar cells would require rod release rates of 80-100 v/s (Rao et al., 1994; van Rossum and Smith,  
532 1998). Consistent with this conclusion, our model indicated that Poisson release at a rate of 34 v/s would  
533 not provide the level of performance observed in rod bipolar cells unless we employed an unusually long  
534 suppression duration of 500 ms.

535 A second strategy suggested to overcome noise in release rates is to make release more regular. At  
536 hyperpolarized membrane potentials, we found that glutamate release from rods followed a Poisson  
537 distribution similar to that seen at many other neurons (Malagon et al., 2016; Miki, 2019). This nearly  
538 ubiquitous feature of neurons was established in the 1950s by Bernard Katz who modeled spontaneous  
539 release events to develop the quantal hypothesis of neurotransmission (Kavalali, 2015, 2018). The  
540 occasional unitary events observed in rods held at -40 mV also showed a Poisson distribution of intervals.  
541 However, the dominant feature of release at -40 mV was the appearance of multi-vesicular release events  
542 occurring at fairly regular intervals. The distribution of intervals between multi-vesicular events could not  
543 be explained by Poisson statistics and were instead more consistent with an Erlang process, having a CV  
544 narrower than expected from a Poisson process. Erlang processes can be generated by waiting a certain  
545 number of Poisson intervals between events and the accumulation of Poisson intervals reduces variability  
546 to regularize release. It was suggested previously that an Erlang process might play a role in transmitting  
547 single photon responses from rods (Schein and Ahmad, 2005, 2006). Our experimental data showed a  
548 narrower distribution than expected for a Poisson process consistent with the accumulation of as many as  
549 12 Poisson events before each multi-vesicular release event. The cumulative wait times for replenishment  
550 of multiple vesicles to the releasable pool at the base of the synaptic ribbon provides a possible mechanism  
551 for achieving an Erlang-like process to enhance regularity in release rates. Predictions of Schein and  
552 Ahmad suggested that achieving reliable single photon detection with a release rate of 100 v/s/ribbon would  
553 require an Erlang process with an Erlang factor of 66 (i.e., an accumulation of 66 Poisson intervals) (Schein  
554 and Ahmad, 2006). Our model, which among other things differed by including a thresholding non-linearity

555 at the rod-to-rod bipolar cell synapse, showed that even a modest increase in regularity combined with  
556 multivesicular release can improve the post-synaptic detection of single photon events.

557 Another surprising characteristic of the multi-vesicular release in rods was its sensitivity to small  
558 voltage changes. While the overall rate of release parallels changes in  $I_{Ca}$ , a small hyperpolarizing voltage  
559 change caused appreciable pauses in release. The average interevent interval dropped close to zero during  
560 a simulated single photon response, rather than declining only ~20-25% as predicted from the decline in  
561  $I_{Ca}$ . Hyperpolarizing the membrane by only 1 mV, similar to the amplitude of single photon responses in  
562 primate rods (Schneeweis and Schnapf, 1995), also caused an appreciable pause in release. The  
563 mechanisms that coordinate release among vesicles to produce this exquisite sensitivity remain unclear.

564 Recent studies on mice in which synaptic ribbons have been eliminated by deleting the key ribbon  
565 protein, Ribeye, showed surprisingly modest deficits (Fairless et al., 2020; Okawa et al., 2019)  
566 Multivesicular release in both salamander and mouse rods involves ribbon-associated vesicles (Hays et al.,  
567 2020b)(Hays et al., 2020a). One role of the ribbon may thus be to help organize vesicles to promote  
568 multivesicular release, implementing an Erlang process to improve the encoding of light responses near  
569 scotopic threshold (Schein and Ahmad, 2005).

570 The need to rapidly recycle vesicles is a barrier to rods maintaining high release rates. Rod spherules  
571 in mouse retina possess 5,800-7,500 vesicles apiece (Zampighi et al., 2011) and so the entire pool of vesicles  
572 would be depleted in roughly a minute if release were maintained at 100 vesicles/s. Our results suggest that  
573 the temporally regular multi-vesicular release strategy employed by rods provides an efficient means of  
574 encoding small voltage changes to meet both constraints on high release rates and requirements for reliable  
575 signaling at rod ribbon synapses (Sterling and Laughlin, 2015).

576

577 Acknowledgements

578 Funding was provided by UNMC Graduate Fellowship (CLH) and NIH grant EY10542 (WBT).

579

## 580 References

- 581 Arriza, J.L., Eliasof, S., Kavanaugh, M.P., and Amara, S.G. (1997). Excitatory amino acid transporter 5, a  
582 retinal glutamate transporter coupled to a chloride conductance. *Proceedings of the National Academy*  
583 *of Sciences of the United States of America* *94*, 4155-4160.
- 584 Barlow, H.B. (1956). Retinal noise and absolute threshold. *J Opt Soc Am* *46*, 634-639.
- 585 Baylor, D.A., Nunn, B.J., and Schnapf, J.L. (1984). The photocurrent, noise and spectral sensitivity of rods  
586 of the monkey *Macaca fascicularis*. *J Physiol* *357*, 575-607.
- 587 Behrens, C., Schubert, T., Haverkamp, S., Euler, T., and Berens, P. (2016). Connectivity map of bipolar  
588 cells and photoreceptors in the mouse retina. *Elife* *5*.
- 589 Berntson, A., Smith, R.G., and Taylor, W.R. (2004). Transmission of single photon signals through a  
590 binary synapse in the mammalian retina. *Vis Neurosci* *21*, 693-702.
- 591 Burns, M.E., Mendez, A., Chen, J., and Baylor, D.A. (2002). Dynamics of cyclic GMP synthesis in retinal  
592 rods. *Neuron* *36*, 81-91.
- 593 Calkins, D.J., and Sterling, P. (1999). Evidence that circuits for spatial and color vision segregate at the  
594 first retinal synapse. *Neuron* *24*, 313-321.
- 595 Cangiano, L., Asteriti, S., Cervetto, L., and Gargini, C. (2012). The photovoltage of rods and cones in the  
596 dark-adapted mouse retina. *J Physiol* *590*, 3841-3855.
- 597 Chichilnisky, E.J., and Rieke, F. (2005). Detection sensitivity and temporal resolution of visual signals near  
598 absolute threshold in the salamander retina. *J Neurosci* *25*, 318-330.
- 599 Cork, K.M., Van Hook, M.J., and Thoreson, W.B. (2016). Mechanisms, pools, and sites of spontaneous  
600 vesicle release at synapses of rod and cone photoreceptors. *Eur J Neurosci* *44*, 2015-2027.
- 601 Dembla, E., Dembla, M., Maxeiner, S., and Schmitz, F. (2020). Synaptic ribbons foster active zone  
602 stability and illumination-dependent active zone enrichment of RIM2 and Cav1.4 in photoreceptor  
603 synapses. *Sci Rep* *10*, 5957.
- 604 Duda, R., Hart, P., and Stork, D. (2001). *Pattern classification* (New York: Wiley & Sons).
- 605 Fairless, R., Williams, S.K., Katiyar, R., Maxeiner, S., Schmitz, F., and Diem, R. (2020). ERG Responses in  
606 Mice with Deletion of the Synaptic Ribbon Component RIBEYE. *Invest Ophthalmol Vis Sci* *61*, 37.
- 607 Field, G.D., and Rieke, F. (2002a). Mechanisms regulating variability of the single photon responses of  
608 mammalian rod photoreceptors. *Neuron* *35*, 733-747.
- 609 Field, G.D., and Rieke, F. (2002b). Nonlinear signal transfer from mouse rods to bipolar cells and  
610 implications for visual sensitivity. *Neuron* *34*, 773-785.
- 611 Field, G.D., Uzzell, V., Chichilnisky, E.J., and Rieke, F. (2019). Temporal resolution of single-photon  
612 responses in primate rod photoreceptors and limits imposed by cellular noise. *J Neurophysiol* *121*, 255-  
613 268.
- 614 Fu, Y., Kefalov, V., Luo, D.G., Xue, T., and Yau, K.W. (2008). Quantal noise from human red cone pigment.  
615 *Nature neuroscience* *11*, 565-571.
- 616 Goodchild, A.K., Ghosh, K.K., and Martin, P.R. (1996). Comparison of photoreceptor spatial density and  
617 ganglion cell morphology in the retina of human, macaque monkey, cat, and the marmoset *Callithrix*  
618 *jacchus*. *J Comp Neurol* *366*, 55-75.
- 619 Grassmeyer, J.J., Cahill, A.L., Hays, C.L., Barta, C., Quadros, R.M., Gurumurthy, C.B., and Thoreson, W.B.  
620 (2019). Ca<sup>2+</sup> sensor synaptotagmin-1 mediates exocytosis in mammalian photoreceptors. *Elife* *8*.
- 621 Gross, O.P., Pugh, E.N., Jr., and Burns, M.E. (2015). cGMP in mouse rods: the spatiotemporal dynamics  
622 underlying single photon responses. *Front Mol Neurosci* *8*, 6.
- 623 Hasegawa, J., Obara, T., Tanaka, K., and Tachibana, M. (2006). High-density presynaptic transporters are  
624 required for glutamate removal from the first visual synapse. *Neuron* *50*, 63-74.

- 625 Hays, C.L., Grassmeyer, J.J., Wen, X., Janz, R., Heidelberger, R., and Thoreson, W.B. (2020a).  
626 Simultaneous Release of Multiple Vesicles from Rods Involves Synaptic Ribbons and Syntaxin 3B. *Biophys*  
627 *J* *118*, 967-979.
- 628 Hays, C.L., Sladek, A.L., and Thoreson, W.B. (2020b). Resting and stimulated mouse rod photoreceptors  
629 show distinct patterns of vesicle release at ribbon synapses. *J Gen Physiol* *152*.
- 630 Hecht, S., Shlaer, S., and Pirenne, M.H. (1942). Energy, Quanta, and Vision. *J Gen Physiol* *25*, 819-840.
- 631 Hornstein, E.P., Verweij, J., Li, P.H., and Schnapf, J.L. (2005). Gap-junctional coupling and absolute  
632 sensitivity of photoreceptors in macaque retina. *J Neurosci* *25*, 11201-11209.
- 633 Kavalali, E.T. (2015). The mechanisms and functions of spontaneous neurotransmitter release. *Nat Rev*  
634 *Neurosci* *16*, 5-16.
- 635 Kavalali, E.T. (2018). Spontaneous neurotransmission: A form of neural communication comes of age. *J*  
636 *Neurosci Res* *96*, 331-334.
- 637 Kavalali, E.T. (2019). Neuronal Ca(2+) signalling at rest and during spontaneous neurotransmission. *J*  
638 *Physiol*.
- 639 Malagon, G., Miki, T., Llano, I., Neher, E., and Marty, A. (2016). Counting Vesicular Release Events  
640 Reveals Binomial Release Statistics at Single Glutamatergic Synapses. *J Neurosci* *36*, 4010-4025.
- 641 Miki, T. (2019). What We Can Learn From Cumulative Numbers of Vesicular Release Events. *Front Cell*  
642 *Neurosci* *13*, 257.
- 643 Okawa, H., Miyagishima, K.J., Arman, A.C., Hurley, J.B., Field, G.D., and Sampath, A.P. (2010). Optimal  
644 processing of photoreceptor signals is required to maximize behavioural sensitivity. *J Physiol* *588*, 1947-  
645 1960.
- 646 Okawa, H., and Sampath, A.P. (2007). Optimization of single-photon response transmission at the rod-  
647 to-rod bipolar synapse. *Physiology (Bethesda)* *22*, 279-286.
- 648 Okawa, H., Yu, W.Q., Matti, U., Schwarz, K., Odermatt, B., Zhong, H., Tsukamoto, Y., Lagnado, L., Rieke,  
649 F., Schmitz, F., *et al.* (2019). Dynamic assembly of ribbon synapses and circuit maintenance in a  
650 vertebrate sensory system. *Nat Commun* *10*, 2167.
- 651 Otis, T.S., and Jahr, C.E. (1998). Anion currents and predicted glutamate flux through a neuronal  
652 glutamate transporter. *J Neurosci* *18*, 7099-7110.
- 653 Rao-Mirotznik, R., Buchsbaum, G., and Sterling, P. (1998). Transmitter concentration at a three-  
654 dimensional synapse. *J Neurophysiol* *80*, 3163-3172.
- 655 Rao, R., Buchsbaum, G., and Sterling, P. (1994). Rate of quantal transmitter release at the mammalian  
656 rod synapse. *Biophys J* *67*, 57-63.
- 657 Reingruber, J., Holcman, D., and Fain, G.L. (2015). How rods respond to single photons: Key adaptations  
658 of a G-protein cascade that enable vision at the physical limit of perception. *Bioessays* *37*, 1243-1252.
- 659 Rieke, F., and Baylor, D.A. (1998). Origin of reproducibility in the responses of retinal rods to single  
660 photons. *Biophys J* *75*, 1836-1857.
- 661 Sakitt, B. (1972). Counting every quantum. *J Physiol* *223*, 131-150.
- 662 Sampath, A.P., and Rieke, F. (2004). Selective transmission of single photon responses by saturation at  
663 the rod-to-rod bipolar synapse. *Neuron* *41*, 431-443.
- 664 Schein, S., and Ahmad, K.M. (2005). A clockwork hypothesis: synaptic release by rod photoreceptors  
665 must be regular. *Biophys J* *89*, 3931-3949.
- 666 Schein, S., and Ahmad, K.M. (2006). Efficiency of synaptic transmission of single-photon events from rod  
667 photoreceptor to rod bipolar dendrite. *Biophys J* *91*, 3257-3267.
- 668 Schneeweis, D.M., and Schnapf, J.L. (1995). Photovoltage of rods and cones in the macaque retina.  
669 *Science* *268*, 1053-1056.

670 Schneider, N., Cordeiro, S., Machtens, J.P., Braams, S., Rauen, T., and Fahlke, C. (2014). Functional  
671 properties of the retinal glutamate transporters GLT-1c and EAAT5. *The Journal of biological chemistry*  
672 *289*, 1815-1824.

673 Sheng, Z., Choi, S.Y., Dharia, A., Li, J., Sterling, P., and Kramer, R.H. (2007). Synaptic Ca<sup>2+</sup> in darkness is  
674 lower in rods than cones, causing slower tonic release of vesicles. *J Neurosci* *27*, 5033-5042.

675 Smith, R.G., and Dhingra, N.K. (2009). Ideal observer analysis of signal quality in retinal circuits. *Prog*  
676 *Retin Eye Res* *28*, 263-288.

677 Sterling, P., and Laughlin, S. (2015). *Principles of Neural Design* (Cambridge, MA: MIT Press).

678 Takeshita, D., Smeds, L., and Ala-Laurila, P. (2017). Processing of single-photon responses in the  
679 mammalian On and Off retinal pathways at the sensitivity limit of vision. *Philos Trans R Soc Lond B Biol*  
680 *Sci* *372*.

681 Taylor, W.R., and Smith, R.G. (2004). Transmission of scotopic signals from the rod to rod-bipolar cell in  
682 the mammalian retina. *Vision Res* *44*, 3269-3276.

683 Tinsley, J.N., Molodtsov, M.I., Prevedel, R., Wartmann, D., Espigule-Pons, J., Lauwers, M., and Vaziri, A.  
684 (2016). Direct detection of a single photon by humans. *Nat Commun* *7*, 12172.

685 Trexler, E.B., Casti, A.R., and Zhang, Y. (2011). Nonlinearity and noise at the rod-rod bipolar cell synapse.  
686 *Vis Neurosci* *28*, 61-68.

687 Tsukamoto, Y., and Omi, N. (2013). Functional allocation of synaptic contacts in microcircuits from rods  
688 via rod bipolar to All amacrine cells in the mouse retina. *J Comp Neurol* *521*, 3541-3555.

689 van Rossum, M.C., and Smith, R.G. (1998). Noise removal at the rod synapse of mammalian retina. *Vis*  
690 *Neurosci* *15*, 809-821.

691 Yue, W.W., Frederiksen, R., Ren, X., Luo, D.G., Yamashita, T., Shichida, Y., Cornwall, M.C., and Yau, K.W.  
692 (2017). Spontaneous activation of visual pigments in relation to openness/closedness of chromophore-  
693 binding pocket. *eLife* *6*.

694 Zampighi, G.A., Schietroma, C., Zampighi, L.M., Woodruff, M., Wright, E.M., and Brecha, N.C. (2011).  
695 Conical tomography of a ribbon synapse: structural evidence for vesicle fusion. *PLoS One* *6*, e16944.

696 Zhang, C., and Peskin, C.S. (2015). Improved signaling as a result of randomness in synaptic vesicle  
697 release. *Proc Natl Acad Sci U S A* *112*, 14954-14959.

698
